# Supplementary material for: Aphotic N 2 fixation along an oligotrophic to ultraoligotrophic transect in the Western Tropical South Pacific Ocean
Source: Copernicus journal article supplement (doi:10.5194/bg-2017-542), 2018-01-05
Supplement: Supplementary file 1 [file bg-2017-542-supplement.pdf]

## Supplementary material

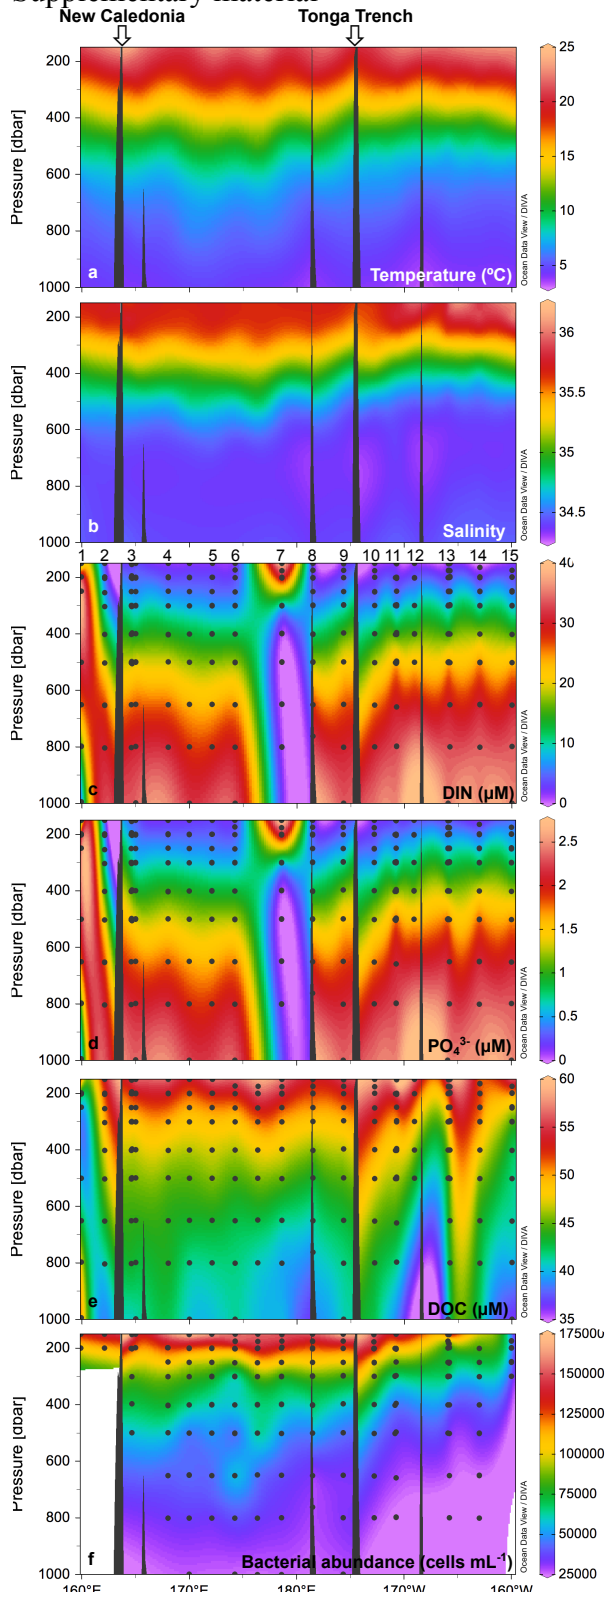

Figure S1: Longitudinal sections of (a) temperature ( $^{\circ}\text{C}$ ), (b) salinity, (c) dissolved inorganic nitrogen concentrations (DIN;  $\mu\text{M}$ ), (d) phosphate concentrations ( $\text{PO}_4^{3-}$ ;  $\mu\text{M}$ ), (e) dissolved organic carbon concentrations (DOC;  $\mu\text{M}$ ), and (f) bacterial abundance ( $\text{cells mL}^{-1}$ ). For reference, the station numbers are displayed over panel (c).

Supplementary tables

**Table S1: Bonferroni-corrected Spearman correlations between environmental variables (temperature, salinity, oxygen), dissolved inorganic nitrogen (NOx) concentrations, phosphate (PO<sub>4</sub><sup>3-</sup>) concentrations, N<sub>2</sub> fixation rates, the first and second principal coordinates of dissolved organic matter (DOM, explaining 87 and 5 %, respectively), and the principal coordinates of *nifH* operational taxonomic units (OTUs; explaining 22.3, 14.7 and 10.9%, respectively).**

| Parameter                     | Spearman correlation | Salinity | Temperature | Oxygen  | DOC     | NOx      | PO <sub>4</sub> <sup>3-</sup> | N <sub>2</sub> fixation | DOM PCo1 | DOM PCo2 | <i>nifH</i> OTU PCo1 | <i>nifH</i> OTU PCo2 | <i>nifH</i> OTU PCo3 |
|-------------------------------|----------------------|----------|-------------|---------|---------|----------|-------------------------------|-------------------------|----------|----------|----------------------|----------------------|----------------------|
| Salinity                      | Coefficient          | 1        | 0.905**     | 0.711** | 0.725** | -0.683** | -0.699**                      | 0.284*                  | 0.173    | -0.203   | -0.371               | 0.195                | 0.257                |
|                               | Significance         | .        | 0           | 0       | 0       | 0        | 0                             | 0.029                   | 0.454    | 0.434    | 0.468                | 0.362                | 0.623                |
| Temperature                   | Coefficient          |          | 1           | 0.850** | 0.701** | -0.830** | -0.842**                      | .263*                   | 0.11     | -0.279   | -0.543               | 0.175                | 0.143                |
|                               | Significance         |          | .           | 0       | 0       | 0        | 0                             | 0.045                   | 0.634    | 0.277    | 0.266                | 0.414                | 0.787                |
| Oxygen                        | Coefficient          |          |             | 1       | .622**  | -0.773** | -0.853**                      | 0.185                   | 0.188    | -0.091   | 0                    | 0.231                | -0.1                 |
|                               | Significance         |          |             | .       | 0       | 0        | 0                             | 0.173                   | 0.414    | 0.729    | 1                    | 0.313                | 0.873                |
| DOC                           | Coefficient          |          |             |         | 1       | -0.525** | -0.564**                      | .269*                   | -0.078   | -0.387   | -0.6                 | 0.101                | 0.371                |
|                               | Significance         |          |             |         | .       | 0        | 0                             | 0.042                   | 0.737    | 0.125    | 0.208                | 0.647                | 0.468                |
| NOx                           | Coefficient          |          |             |         |         | 1        | .960**                        | -0.054                  | -0.145   | 0.093    | 0.657                | -0.283               | 0.657                |
|                               | Significance         |          |             |         |         | .        | 0                             | 0.7                     | 0.541    | 0.762    | 0.156                | 0.18                 | 0.156                |
| PO <sub>4</sub> <sup>3-</sup> | Coefficient          |          |             |         |         |          | 1                             | -0.103                  | -0.151   | 0.104    | 0.657                | -0.287               | 0.657                |
|                               | Significance         |          |             |         |         |          | .                             | 0.453                   | 0.524    | 0.734    | 0.156                | 0.175                | 0.156                |
| N <sub>2</sub> fixation       | Coefficient          |          |             |         |         |          |                               | 1                       | -0.356   | 0.083    | -0.371               | -0.199               | 0.371                |
|                               | Significance         |          |             |         |         |          |                               | .                       | 0.113    | 0.751    | 0.468                | 0.364                | 0.468                |
| DOM PCo1                      | Coefficient          |          |             |         |         |          |                               |                         | 1        | 0.385    | .                    | -1.000**             | .                    |
|                               | Significance         |          |             |         |         |          |                               |                         | .        | 0.217    | .                    | .                    | .                    |
| DOM PCo2                      | Coefficient          |          |             |         |         |          |                               |                         |          | 1        | .                    | .                    | .                    |
|                               | Significance         |          |             |         |         |          |                               |                         |          | .        | .                    | .                    | .                    |
| <i>nifH</i> OTU PCo1          | Coefficient          |          |             |         |         |          |                               |                         |          |          | 1                    | .                    | 0.6                  |
|                               | Significance         |          |             |         |         |          |                               |                         |          |          | .                    | .                    | 0.4                  |
